# Supplementary material for: Distinct overlapping functions for Prickle1 and Prickle2 in the polarization of the airway epithelium
Source: PubMed Central journal article supplement (PMC9513604; doi:10.3389/fcell.2022.976182), 2022-09-13
Supplement: DataSheet1.pdf [file DataSheet1.pdf]

## **Supplemental Materials**

Inventory:

1. 4 Supplemental Figures
2. 3 Supplemental Tables

## Supplemental Figures

Figure S1. **Alignment of mouse Pk1-4 protein sequences.** PET (green) and LIM (red) domains are highlighted. The four C-terminal amino acids represent the CAAX motif.

```

MmPk4 -----MSVQNSDWSL----- 10
MmPk3 MFARGSRRRRSGRAPPEAEDPARGQPCNSCREQCPGFLHGWRKICQHKCKPREHVAVRT 60
MmPk1 ----- 0
MmPk2 -----MVTV 4

MmPk4 -----QQDNPIFREPDPVYVYDSDSGRRPVEDYEDTSAQAATCSSLGPCLD----- 57
MmPk3 VPDVLERIMCRLISDF-QRHSISDDSGC-ASEEY-----AWVPPGLKPEQVYQ 107
MmPk1 MPLEMEPKMSKLVFGC-QRSSTSDSGC-ALEEY-----AWVPPGLRPEQIQI 47
MmPk2 MPLEMEKTIKLMFDF-QRSSTSDSGC-ALEEY-----AWVPPGLKPEQVHQ 51
      . : . : : * . * * * * : * * *

MmPk4 -----INQVSNWPGFRLLQQLPPQSDERYCLALGEEELAQLRFLCAQRKOR 105
MmPk3 FFSCLPEKVPYVYVNSPGEKYRIKQLLHQLPHDSEAQYCTALEEEKELRAFSAQRKRE 167
MmPk1 YFACLPEEKVPYVYVNSPGEKRIKQLLYQLPHDNEVRYCQSLSEEEKELQVFAQRKRE 107
MmPk2 YFACLPEEKVPYVYVNSAGEKLRKQLLHQLPHDNEVRYCNSLDEEEKRELKLFNSQRKRE 111
      : * . : . : : * * * * * : * : * * * * : * : * * * * :

MmPk4 SLGQGVARLLPPKLEGYTCKCKKLLDPGEYGVFAARAGEQSCWHRPCFACQACGGLIN 165
MmPk3 NLGRATVRIFPVTITGAICEECKGQIGGGIVAFASRAGLACWHPQCFVCTTCQELLVD 227
MmPk1 ALGRGTIKLRSRAVHACVCEQGLQMGGEVAVFASRAGPGVWCWHPFCVCTCNEELLVD 167
MmPk2 NLGRGNVRFPFVMTGAICEQCGGQIKGGIVAFASRAGHGICWHPFCVCTVNEELLVD 171
      * * : . : : : * : * : * : * * * * * * * * * * * * * * : * :

MmPk4 LIYFYHGHLYCGRHBAELLRPRCPACDQLIFSQRCTAEGQRWHENHFCCQDCAGPLDG 225
MmPk3 LIYFYHAGKYCGRHBAELRPRCAQACDEIFSPPECTAEGRHHWHMGGHFCCEASLGG 287
MmPk1 LIYFYQDGKIHCGRHBALLKPRCSACDEIFADECTAEGRHHWHMGGHFCCECETVLGG 227
MmPk2 LIYFYQDGKIYGRHBAELKPRCAACDEIFADECTAEGRHHWHMGGHFCCECETVLGG 231
      * * * * * : * : * * * * * * * * * * * * * * * * * * * * * *

MmPk4 GRVALPGGSPCCPSCFSAIRYRSA--GSSSVGVAEQASFEPEGDPDSVGMNRASDDKI 282
MmPk3 QRVMNRQSRPHCCACYEARHAEYCDGCGEHLGDDQGMAYEGQH-----WHASDRCFCC 341
MmPk1 QRVMNRGRPFCCGCFESLYAEYCTCGEHLGDDHAQMTYDGH-----WHATEACFSC 281
MmPk2 QRVMNRGRPYCCHCFESLYAEYCDTCAOHIGIDQGMAYEGQH-----WHATECFCC 285
      * * : . * * * * . : . : . . * * * * * : * : * : * :

MmPk4 TSRAALLSAVPTLLETLN---GASKRQDRDGPQTGPSPIEDS----- 322
MmPk3 SRCRSRPLLRPFLPRRGLFCSACSLGSETTAPGPRRSWSACTVTTPLTSTASFSAT 401
MmPk1 AQCKASLLGCPFLPKQGIYCSHTCSLGEDIHASDSDSAFQARSRSRRS--VRMGRS 339
MmPk2 AHCKKSLLRPFLPKQGIYCSACSAAGEDPNGSDSDSAFQARAKESRRS--AKIGRN 343
      : * * * * . * * : . * * * *

MmPk4 -----P-----CP-----TCSSSE---SEPEGFFF 340
MmPk3 EGTSETASKGTCTKAEPAGPEEPSSHFRG---APRRHSMPELGLRSAFEPT----- 451
MmPk1 SRSADQCRQSLLL--SPALNYK--FPLSGNADDTLSRKLDDVSLASRQAGAFANEFWK 395
MmPk2 KGTTEAMLNQ---HSQLQVS--SNRLSA-DVDPLSVQMDLLSL-SQTPSLNRDPIWR 395

MmPk4 G-----QRLPEPWKTPENLQADDRD-I--SR---KHCTIC----- 369
MmPk3 -----ESPGHPAPHDDNAPGRQSTPRVSRFDPLVSEGGPRRTLSAPPAQRRRPPPP- 505
MmPk1 ARVEQEAASEDPEEWAHEHEDY-----MTQLLLKFGDKNLFQ-QSSEVDPRASEHW 444
MmPk2 SREEPFHYGNKMEQNQSQ-S-----PLQLLSQCNIRTSYS-PGG-QGAGAQPDMW 442
      :

MmPk4 ----- 369
MmPk3 -----RT---PSCHH----- 513
MmPk1 IPDNMVTNKP--EVKPNHQGLASKKYQSDMYN----AQSDGLGDSAYGSHPGPASSRR 497
MmPk2 AKHFSNPKRSSSMALHGGSFIQECREDIYGRMLMSQESYSDMSSQSFNETRGSIPVK 502

MmPk4 ----- 369
MmPk3 ----- 513
MmPk1 LQEL-DLDHGAAGYTHDQSQWYEDSLECLSDLK-PEQSIKSDMSLALSNITGASVDGES 555
MmPk2 YEEEEEEGGISTQCRRRPLSLKYTEDMTPTTEQTPRGSMSLALSNATGLSABGGA 562

MmPk4 ----- 369
MmPk3 ----- 513
MmPk1 KPRPRLYS--LQNF-EEIEAEDCEKMSNMGLTNSMMLHRSAESLQSLNSGLCPEKILPEE 612
MmPk2 KRQEHLSRFSMPDLKSDSGMNVSEKLSNMGLTNSMMLQFRSAESVRSLLSAQYQEMENL 622

MmPk4 ----- 369
MmPk3 -----HHRRRRRQRHR-RRGS 528
MmPk1 KPAHLPLVLR-SKSQSR-PQOVKFSDDVIDNG-SYDIEIRQPPMSERTRRRHYFEERGS 669
MmPk2 HQLSNPLGYRDLQSHGRMHQSFDDGFIASSKLPQGEVHVIQPMSETRRRRTSRD-DNR 681

MmPk4 ----- 369
MmPk3 ----- 543
MmPk1 RPHHHRRRRSRKSRSDNALNLVTERKYSY--KDRRLVTPDHYEKFIQNKSARELQAYMQ 727
MmPk2 RFRPHRRRRSRKSRSDNALHLASEREVIARLKERPLRAREDYDQFMRQSRFQESLGGGS 741

MmPk4 ----- 369
MmPk3 -----D-----LGSQSDSGSCSSSPSSPSSSEDDGFFLGERI 577
MmPk1 NANLYSQYAHATSDYALQNGMNRFLGCGEDDSDWCS---SSTSSSDSEEYGLQPI 784
MmPk2 RRDLYSQCPRTVSDLALQNAFGRNGPYF--TEYDWCSS---TCSSSESDEYGLGPEI 796

MmPk4 ----- 369
MmPk3 PLPPLCRPRTTQDTSTET-FNSPAQLVQE-SHPVMPQTRDKNCIVA 624
MmPk1 PQPRPQRFYTYDGLSSPA-SALPTPOFTQRTKSKKKKGGKNCIIS 832
MmPk2 PQPARLYVTSDELLHKYSSYGVPKSSTLGGRGQLHSRKRQKSKNCIIS 845

```

Figure S2. **Schematics of MTEC culture ciliogenesis and *Pk* expression.** **A.** Schematic of ciliogenesis during MTEC culture progression. Ciliated cell formation begins at ALI+2d. PCP acquisition indicated by crescent formation is evident slightly prior to the appearance of cilia. **B.** Schematic of *Pk1-4* expression during MTEC timecourse. **C.** Schematic of *Pk1-4* cell type specific enrichment in the airway epithelium.

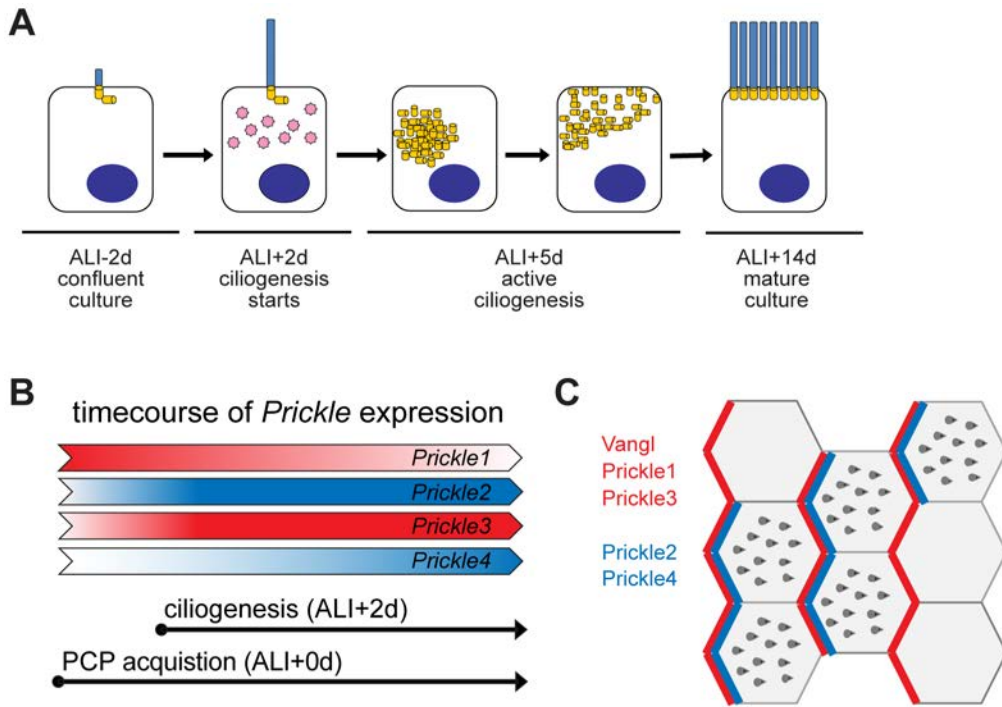

Figure S3. **Basal body misorientation in Pk mutants.** **A.** Example TEM image of basal feet on cilia and determination of ciliary orientation. Arrows point to basal feet. **B-C.** Table summary of the number of basal feet quantitated in adult (**B**) and perinatal (**C**) mice.

**A**

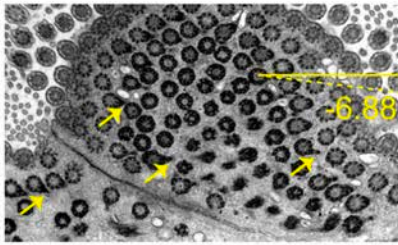

lung → oral

**B**

|                                   | genotypes     |                           |                           |                                                       |                                                       |                                 |                                                             |
|-----------------------------------|---------------|---------------------------|---------------------------|-------------------------------------------------------|-------------------------------------------------------|---------------------------------|-------------------------------------------------------------|
|                                   | wildtype      | <i>Pk1</i> <sup>+/-</sup> | <i>Pk2</i> <sup>-/-</sup> | <i>Pk1</i> <sup>+/-</sup> ; <i>Pk2</i> <sup>+/-</sup> | <i>Pk1</i> <sup>+/-</sup> ; <i>Pk2</i> <sup>-/-</sup> | <i>Vangl1CKO</i> <sup>Δ/Δ</sup> | <i>Pk2</i> <sup>-/-</sup> ; <i>Vangl1CKO</i> <sup>Δ/Δ</sup> |
| cells analyzed (n)                | 28            | 36                        | 77                        | 63                                                    | 63                                                    | 88                              | 70                                                          |
| basal bodies analyzed (n)         | 277           | 444                       | 1,039                     | 743                                                   | 595                                                   | 1220                            | 1060                                                        |
| ave. basal bodies per cell +/- SE | 10.65 +/- 1.4 | 12.33 +/- 1.03            | 13.49 +/- 0.79            | 11.79 +/- 1.26                                        | 9.44 +/- 0.39                                         | 13.86 +/- 0.78                  | 15.14 +/- 1.16                                              |

**C**

|                          | genotypes |                           |                           |                                                       |                                                       |                                                       |
|--------------------------|-----------|---------------------------|---------------------------|-------------------------------------------------------|-------------------------------------------------------|-------------------------------------------------------|
|                          | wildtype  | <i>Pk1</i> <sup>-/-</sup> | <i>Pk2</i> <sup>-/-</sup> | <i>Pk1</i> <sup>+/-</sup> ; <i>Pk2</i> <sup>-/-</sup> | <i>Pk1</i> <sup>+/-</sup> ; <i>Pk2</i> <sup>+/-</sup> | <i>Pk1</i> <sup>-/-</sup> ; <i>Pk2</i> <sup>-/-</sup> |
| mouse age                | E18.5     | P0                        | P0                        | P16                                                   | P0                                                    | E18.5                                                 |
| mice (n)                 | 3         | 2                         | 2                         | 1                                                     | 2                                                     | 3                                                     |
| basal feet analyzed (n)  | 23        | 175                       | 133                       | 180                                                   | 67                                                    | 20                                                    |
| correctly oriented (n)   | 21        | 87                        | 112                       | 96                                                    | 32                                                    | 7                                                     |
| incorrectly oriented (n) | 2         | 88                        | 21                        | 84                                                    | 35                                                    | 13                                                    |

Figure S4. **Developmental phenotypes in Pk mutants.** **A.** Craniofacial and **B.** neural tube closure defects in Pk mutant litter mates from a  $Pk1^{+/-}; Pk2^{+/-}$  x  $Pk1^{+/-}; Pk2^{+/-}$  cross.

**A**

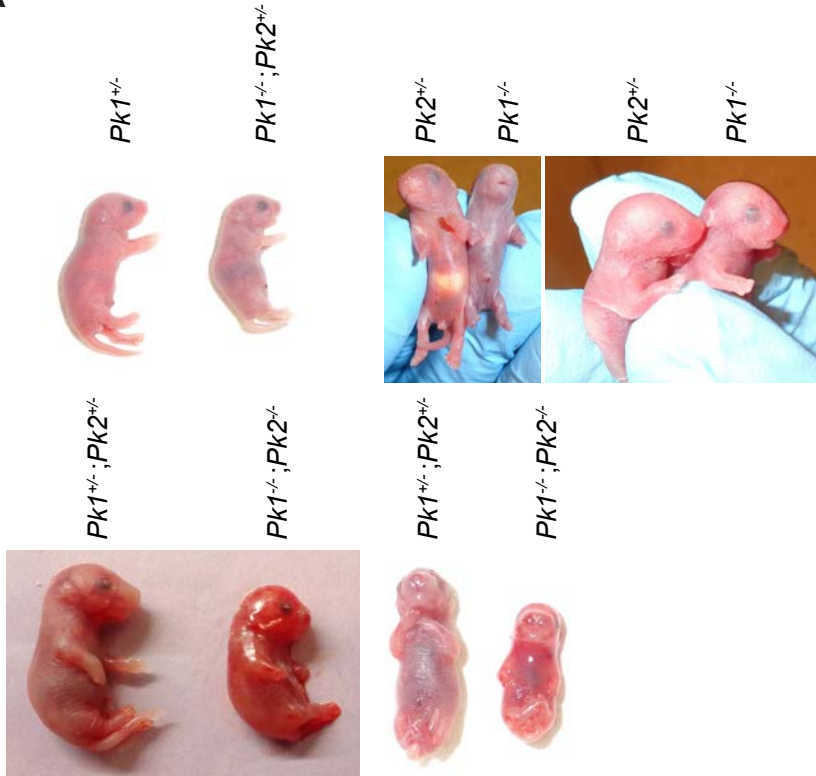

**B**

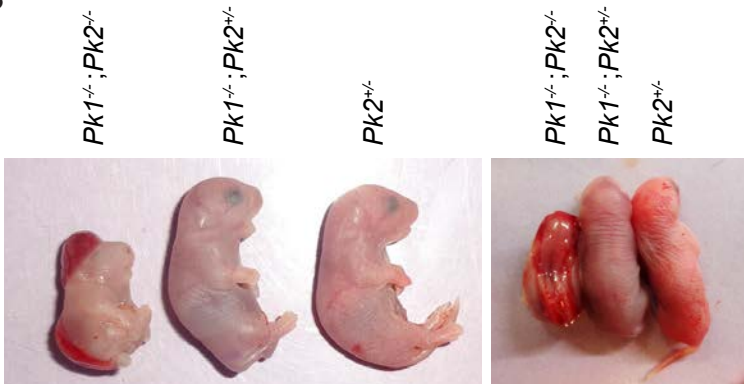

## Supplemental Tables

Table S1. **Antibodies.**

| <b>Protein</b>                         | <b>Antibody</b> | <b>Source</b>              |
|----------------------------------------|-----------------|----------------------------|
| <b>Vangl1</b>                          | HPA025235       | Sigma Aldrich              |
| <b>Prickle1</b>                        | -               | Gibbs <i>et al.</i> , 2016 |
| <b>Prickle2</b>                        | -               | Deans <i>et al.</i> , 2007 |
| <b>Frizzled6</b>                       | AF1526          | R&D Systems                |
| <b>ac. <math>\alpha</math>-Tubulin</b> | ab24610         | Abcam                      |
| <b>GFP</b>                             | 4745-1051       | AbD Serotech               |

Table S2. **Primer sequences.**

| <b>Target</b>            | <b>Forward primer sequence</b> | <b>Reverse primer sequence</b> |
|--------------------------|--------------------------------|--------------------------------|
| <b><i>MmPrickle1</i></b> | GATGGAGAAAGCAAGCCAAG           | TGTGCAGCATGGAAGAGTTC           |
| <b><i>MmPrickle2</i></b> | ACATGGGCACTCTCAACTCC           | TGTATCCTAGGGGGTTGCTG           |
| <b><i>MmPrickle3</i></b> | TGCTGTTTCGAGTGTGAAGC           | CATCACAGTATTCCGCATGG           |
| <b><i>MmPrickle4</i></b> | CCACAGGACAGTGATGAACG           | CCTTCAAGCTTAGGAGGCAG           |
| <b><i>MmCentrin2</i></b> | ACAGGGCAGAACAAGAGCAC           | CCACTGCTTATGGTGACATGG          |
| <b><i>MmGapdh</i></b>    | GACTTCAACAGCAACTCCCAC          | TCCACCACCCTGTTGCTGTA           |

Table S3. Basal feet quantitation of Pk mutant mice from Fig. 4.

| wildtype |              |                |            | $Pk1^{-/-}$ |              |                |            | $Pk2^{-/-}$ |              |                |            | $Pk1^{+/+}; Pk2^{+/+}$ |              |                |            | $Pk1^{-/-}; Pk2^{+/+}$ |              |                |            | $Pk1^{+/+}; Pk2^{-/-}$ |              |                |            |      |              |                |            |
|----------|--------------|----------------|------------|-------------|--------------|----------------|------------|-------------|--------------|----------------|------------|------------------------|--------------|----------------|------------|------------------------|--------------|----------------|------------|------------------------|--------------|----------------|------------|------|--------------|----------------|------------|
| cell     | BB - correct | BB - incorrect | BB - total | cell        | BB - correct | BB - incorrect | BB - total | cell        | BB - correct | BB - incorrect | BB - total | cell                   | BB - correct | BB - incorrect | BB - total | cell                   | BB - correct | BB - incorrect | BB - total | cell                   | BB - correct | BB - incorrect | BB - total | cell | BB - correct | BB - incorrect | BB - total |
| 1        | 4            | 1              | 5          | 1           | 1            | 3              | 4          | 1           | 5            | 0              | 5          | 1                      | 4            | 1              | 5          | 1                      | 2            | 2              | 4          | 1                      | 1            | 0              | 1          |      |              |                |            |
| 2        | 3            | 0              | 3          | 2           | 2            | 5              | 7          | 2           | 8            | 0              | 8          | 2                      | 8            | 11             | 19         | 2                      | 0            | 2              | 2          | 2                      | 0            | 1              | 1          |      |              |                |            |
| 3        | 3            | 0              | 3          | 3           | 1            | 5              | 6          | 3           | 3            | 4              | 7          | 3                      | 0            | 5              | 5          | 3                      | 2            | 3              | 5          | 3                      | 2            | 2              | 4          |      |              |                |            |
| 4        | 1            | 0              | 1          | 4           | 3            | 3              | 6          | 4           | 10           | 1              | 11         | 4                      | 11           | 5              | 16         | 4                      | 0            | 2              | 2          | 4                      | 2            | 0              | 2          |      |              |                |            |
| 5        | 1            | 0              | 1          | 5           | 4            | 1              | 5          | 5           | 8            | 1              | 9          | 5                      | 21           | 0              | 21         | 5                      | 2            | 0              | 2          | 5                      | 0            | 1              | 1          |      |              |                |            |
| 6        | 4            | 0              | 4          | 6           | 3            | 7              | 10         | 6           | 5            | 0              | 5          | 6                      | 2            | 10             | 12         | 6                      | 1            | 3              | 4          | 6                      | 1            | 0              | 1          |      |              |                |            |
| 7        | 1            | 0              | 1          | 7           | 2            | 1              | 3          | 7           | 7            | 0              | 7          | 7                      | 18           | 18             | 36         | 7                      | 2            | 1              | 3          | 7                      | 0            | 1              | 1          |      |              |                |            |
| 8        | 1            | 1              | 2          | 8           | 5            | 0              | 5          | 8           | 4            | 4              | 8          | 8                      | 5            | 7              | 12         | 8                      | 2            | 3              | 5          | 8                      | 0            | 1              | 1          |      |              |                |            |
| 9        | 1            | 0              | 1          | 9           | 3            | 0              | 3          | 9           | 13           | 1              | 14         | 9                      | 5            | 1              | 6          | 9                      | 1            | 1              | 2          | 9                      | 0            | 1              | 1          |      |              |                |            |
| 10       | 2            | 0              | 2          | 10          | 4            | 4              | 8          | 10          | 4            | 3              | 7          | 10                     | 4            | 3              | 7          | 10                     | 3            | 3              | 6          | 10                     | 0            | 3              | 3          |      |              |                |            |
|          |              |                |            | 11          | 0            | 3              | 3          | 11          | 8            | 0              | 8          | 11                     | 3            | 1              | 4          | 11                     | 4            | 1              | 5          | 11                     | 0            | 1              | 1          |      |              |                |            |
|          |              |                |            | 12          | 0            | 2              | 2          | 12          | 8            | 0              | 8          | 12                     | 2            | 2              | 4          | 12                     | 1            | 4              | 5          | 12                     | 0            | 1              | 1          |      |              |                |            |
|          |              |                |            | 13          | 2            | 0              | 2          | 13          | 8            | 2              | 10         | 13                     | 1            | 1              | 2          | 13                     | 4            | 2              | 6          | 13                     | 0            | 2              | 2          |      |              |                |            |
|          |              |                |            | 14          | 3            | 10             | 13         | 14          | 4            | 0              | 4          | 14                     | 3            | 2              | 5          | 14                     | 1            | 5              | 6          | 14                     | 1            | 0              | 1          |      |              |                |            |
|          |              |                |            | 15          | 1            | 0              | 1          | 15          | 5            | 1              | 6          | 15                     | 2            | 2              | 4          | 15                     | 3            | 0              | 3          |                        |              |                |            |      |              |                |            |
|          |              |                |            | 16          | 3            | 6              | 9          | 16          | 4            | 1              | 5          | 16                     | 0            | 1              | 1          | 17                     | 4            | 3              | 7          |                        |              |                |            |      |              |                |            |
|          |              |                |            | 17          | 2            | 1              | 3          | 17          | 5            | 2              | 7          | 17                     | 1            | 2              | 3          |                        |              |                |            |                        |              |                |            |      |              |                |            |
|          |              |                |            | 18          | 0            | 8              | 8          | 18          | 3            | 1              | 4          | 18                     | 5            | 3              | 8          |                        |              |                |            |                        |              |                |            |      |              |                |            |
|          |              |                |            | 19          | 5            | 0              | 5          |             |              |                |            | 19                     | 0            | 6              | 6          |                        |              |                |            |                        |              |                |            |      |              |                |            |
|          |              |                |            | 20          | 12           | 0              | 12         |             |              |                |            | 20                     | 1            | 3              | 4          |                        |              |                |            |                        |              |                |            |      |              |                |            |
|          |              |                |            | 21          | 2            | 3              | 5          |             |              |                |            |                        |              |                |            |                        |              |                |            |                        |              |                |            |      |              |                |            |
|          |              |                |            | 22          | 4            | 0              | 4          |             |              |                |            |                        |              |                |            |                        |              |                |            |                        |              |                |            |      |              |                |            |
|          |              |                |            | 23          | 3            | 3              | 6          |             |              |                |            |                        |              |                |            |                        |              |                |            |                        |              |                |            |      |              |                |            |
|          |              |                |            | 24          | 3            | 2              | 5          |             |              |                |            |                        |              |                |            |                        |              |                |            |                        |              |                |            |      |              |                |            |
|          |              |                |            | 25          | 2            | 2              | 4          |             |              |                |            |                        |              |                |            |                        |              |                |            |                        |              |                |            |      |              |                |            |
|          |              |                |            | 26          | 3            | 3              | 6          |             |              |                |            |                        |              |                |            |                        |              |                |            |                        |              |                |            |      |              |                |            |
|          |              |                |            | 27          | 4            | 2              | 6          |             |              |                |            |                        |              |                |            |                        |              |                |            |                        |              |                |            |      |              |                |            |
|          |              |                |            | 28          | 0            | 3              | 3          |             |              |                |            |                        |              |                |            |                        |              |                |            |                        |              |                |            |      |              |                |            |
|          |              |                |            | 29          | 4            | 3              | 7          |             |              |                |            |                        |              |                |            |                        |              |                |            |                        |              |                |            |      |              |                |            |
|          |              |                |            | 30          | 0            | 3              | 3          |             |              |                |            |                        |              |                |            |                        |              |                |            |                        |              |                |            |      |              |                |            |
|          |              |                |            | 31          | 0            | 3              | 3          |             |              |                |            |                        |              |                |            |                        |              |                |            |                        |              |                |            |      |              |                |            |
|          |              |                |            | 32          | 4            | 0              | 4          |             |              |                |            |                        |              |                |            |                        |              |                |            |                        |              |                |            |      |              |                |            |
|          |              |                |            | 33          | 2            | 2              | 4          |             |              |                |            |                        |              |                |            |                        |              |                |            |                        |              |                |            |      |              |                |            |
| 21       | 2            | 23             |            | 87          | 88           | 175            |            | 112         | 21           | 133            |            | 96                     | 84           | 180            |            | 32                     | 35           | 67             |            | 7                      | 14           | 21             | TOTAL (n)  |      |              |                |            |
