# Supplementary material for: Distinct overlapping functions for Prickle1 and Prickle2 in the polarization of the airway epithelium
Source: PubMed Central journal article supplement (PMC9513604; doi:10.3389/fcell.2022.976182), 2022-09-13
Supplement: DataSheet3.pdf [file DataSheet3.pdf]

## **Supplemental Materials**

Inventory:

1. 4 Supplemental Figures
2. 3 Supplemental Tables

## Supplemental Figures

Figure S1. **Alignment of mouse Pk1-4 protein sequences.** PET (green) and LIM (red) domains are highlighted. The four C-terminal amino acids represent the CAAX motif.

```

MmPk4 -----MSVQNSDWSL----- 10
MmPk3 MFARGSRRRSRGRAPPEAEDFARGQPCNSCREQCPCGFLHGWRKICQKCKPREEHAVRT 60
MmPk1 ----- 0
MmPk2 -----MVTV 4

MmPk4 -----QQDNPIFREPDPPVYTDSDSGRRPVEDYEDTSAQAATCSSLGPCLD----- 57
MmPk3 VPDLEIRIMCLISDF-QRHSISDDSGC-ASEEY-----AHVPPGLRPEQVYQ 107
MmPk1 MPEMEPKMSKLVFGC-QRSSTDDSGC-ALAEY-----AHVPPGLRPEQIQ 47
MmPk2 MPEMEKTIKLMDFD-QRSSTDDSGC-ALAEY-----AHVPPGLRPEQVHQ 51
      . : . : : * * * * * * * *
      . : . : : * * * * * * * *

MmPk4 -----INQVSNWPGFRTLLQLPQSDERYCLAEGEELAQLRFLCAQRKQR 105
MmPk3 FFCLPPEKVPYVNSPGEKYRIKQLLHQLPHDSEAQYCTALEEEKELRAFSAQRKRE 167
MmPk1 YFACLPEEKVPYVNSPGEKRIKQLLHQLPHDNEVRICQSLSEEEKELQVFSQRKRE 107
MmPk2 YFACLPEEKVPYVNSAGEKLRKQLLHQLPHDNEVRICNSLDEEEKELALFSQRKRE 111
      : * . : : : * * * * * * * * : * * * * * * * *

MmPk4 SLGQGVARLLPPKLEGYTCKKCKLLDPGEYGVFAARAGEQSCWHRPCFACQACGGGLIN 165
MmPk3 NLGRATVRIFFVTITGAIACECGKQIGGGDIIVFASRAGLACWHPCFVCTCQELLVD 227
MmPk1 ALGRGTIKLLSRVHVAVCEQCGLQMGGEVAVFASRAGVGVWHPFCVCTCNEELLVD 167
MmPk2 NLGRGNVRFPPVTMTGAIACECGGQIKGGDIIVFASRAGHGICWHPCFVCTCNEELLVD 171
      * * . : : : : * * * * * * * * * * * * * * * * * * * * * *

MmPk4 LIYFYHEGLYGRHHAELLRPRCPACDQLIPSORCTAEGRWHENHFCCQDCAGPLDG 225
MmPk3 LIYFYHAGKVCYGRHHAELRPRCAQCEIIFSPPECTEAGRHWHMGGFCCEASLGG 287
MmPk1 LIYFYQDGKIHCGRHHALLKPRCAACDEIFADECTEAGRHWHMGGFCCECETVLGG 227
MmPk2 LIYFYQDGKIYGRHHAELKPRCAACDEIFADECTEAGRHWHMGGFCCECETVLGG 231
      * * * * * * * * * * * * * * * * * * * * * * * * * * * *

MmPk4 GRYPALPGGSPCCPSCFNRYSR--GSSVGVAGQASFEPEGDPDPSVGNRASSDDKI 282
MmPk3 QRVMNRQSRPHCCACYERHAEYCDGCGEIHGDQGMAYEGQH----WHASDRCCFC 341
MmPk1 QRVIKMDGRPPCCGCFESLYAEYCECTCGEIHGDVHAQMTYDGGH----WHATEACFSC 281
MmPk2 QRVIKMDGRPYCCHCFESLYAEYCDTCAQHIGDQGMAYEGQH----WHATECFCC 285
      * * : . * * * * * : . . . * : . * * : : : * : : .

MmPk4 TSRAALLSAVPTLTLETLN---GASKRQDRDGPQTPGSPIEDS----- 322
MmPk3 SRCRPLILGRPFLPRGLIFCSHACSLGSETTAPGPRRSWSAGVTPLTSTASFSAT 401
MmPk1 AQCKASLLGCPFLPKQGIYCSHTCSLGEDIHASDSDSAFQARSRSR--VRMGRS 339
MmPk2 AHCKKSLILGRPFLPKQGIIFCSHACSAAGEDPNGSDSDSAFQARAKESR--AKIGKN 343
      : * . * * . * * * * * . * * : : .

MmPk4 -----P-----CP-----TCSSSSE---SEPEGFFF 340
MmPk3 EGTSETASKGTCTKAEPANGPEEPSHFLRG--APHRHMPGLGRSAPEPT----- 451
MmPk1 SRSAQCQRLSLL--SPALNYK--FPGLSGNADTLRKLDDVSLASRQAGAFANEEFWK 395
MmPk2 KGKTEEAMLNQ---HSQLQVS--SNRLSA-DVDPLSVQMDLLELS--SQTPLNRPDIWR 395

MmPk4 G-----QRLPEPWKTPENLQADRD-I--SR---KHCTIC----- 369
MmPk3 -----ESPGHAPHPDDNAFGRQSTPRVSRDPLVSEGGPRRTLSAPPAQRPRSPPP- 505
MmPk1 ARVEQEASEDPEWAEHEDY-----MTQLLKFQDKHLFQ-QQSEVDPRASEHW 444
MmPk2 SRBEFPFYGNKMEQNSQ-S-----PLQLLSQCNIRTSYS-PGG-QGAGAQPDMW 442
      :

MmPk4 -----RT---PSCHH----- 369
MmPk3 IPDNMVTNKP--EVKPNHQLGASKKYQSDMY-----AQSDGLGDSAYGSHPGPASSRR 497
MmPk1 AKHFSNPKRSMALRKHGGSPFQECREYYPGRMSQESYSDMSQSFPNETRGSIPVK 502
MmPk2

MmPk4 ----- 369
MmPk3 LQEL-DLDHGAAGYTHDQSQWYEDSLECLSDLK-PEQSIKSDMSLALSNITGASVDGES 513
MmPk1 YEEEEEEEGGISTQCRRPRLSLSLKYTEDMTPEQTFRGSMESLALSNATGLSAEGGA 562
MmPk2

MmPk4 ----- 369
MmPk3 KPRPRLYS--LQNF-EEIEAEDCEKMSNMGLTNSMHLRSESLQSLNSGLCPEKILPEE 612
MmPk1 KRQELSRFSMPDLKSDGMNVSEKLSNMGLTNSMQLRSESVRSLLSAQYQEMEGNL 622
MmPk2

MmPk4 ----- 369
MmPk3 KPAHLVLR--SKSQR--PQVKFSDVDINDG--SYDIEIRQPPMERTRRRHYFERGS 669
MmPk1 HQLSNFLGYRDLQSHGRMHQSFDFDGIASSKLPQGEVHIQPMERTRRRTSRD-DNR 681
MmPk2

MmPk4 ----- 369
MmPk3 HHHHHHPGRHGHRC----- 543
MmPk1 RPHHRRRRSRKSRSDNALNLVTERKYS--KDRLRLVTPDNYEKFIQNSARELQAYMQ 727
MmPk2 RFRPHRRRRSRKSRSDNALHLASEREVIARLKERPPLRAREDYDQPMRQSFQESLGGGS 741

MmPk4 ----- 369
MmPk3 -----D-----LGSQSDSGSCSSPSSPSSSEDDGFLGERI 577
MmPk1 NANLYSQYAHATSDYALQNPQMRFLGLGEDDSDWCS--SSTSSDSEEGYFLGQPI 784
MmPk2 RRDLYSQCPRTVSDALQNAFGERWGPYF--TEYDWC--TCSSSSESDNEGYFLGPEI 796

MmPk4 ----- 369
MmPk3 PLPPLCRPRTTQDSTET-FNSPAQPLVQE-SHPVMPQTRDKNCIVA 624
MmPk1 PQPRPQRFTYYDLDLSSPA-SALPTQFTQRTKSKKKKGGKNCIIS 832
MmPk2 PQPARLYVTSDELLHYSSYGVPKSSTLGGGQLHRRKQKSKNCIIS 845

```

Figure S2. **Schematics of MTEC culture ciliogenesis and *Pk* expression.** **A.** Schematic of ciliogenesis during MTEC culture progression. Ciliated cell formation begins at ALI+2d. PCP acquisition indicated by crescent formation is evident slightly prior to the appearance of cilia. **B.** Schematic of *Pk1-4* expression during MTEC timecourse. **C.** Schematic of *Pk1-4* cell type specific enrichment in the airway epithelium.

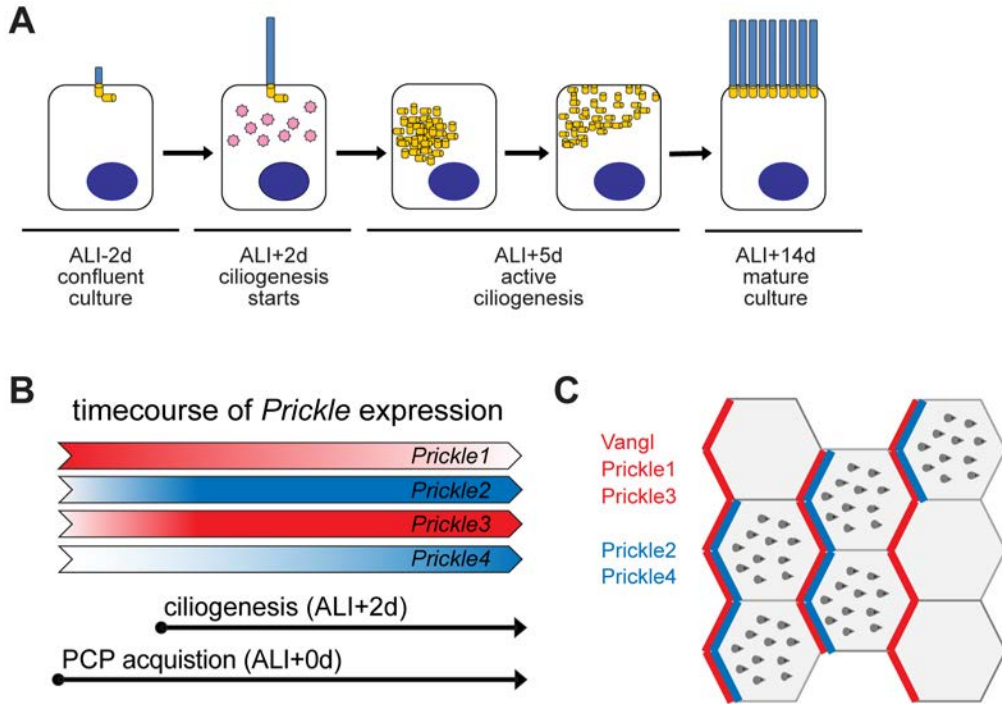

Figure S3. **Basal body misorientation in Pk mutants.** **A.** Example TEM image of basal feet on cilia and determination of ciliary orientation. Arrows point to basal feet. **B-C.** Table summary of the number of basal feet quantitated in adult (**B**) and perinatal (**C**) mice.

**A**

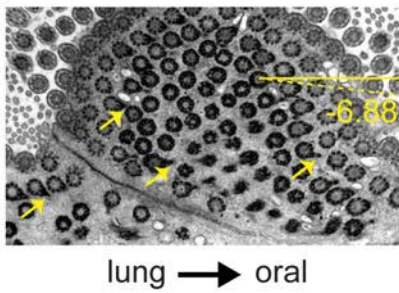

**B**

|                                   | genotypes     |                           |                           |                                                       |                                                       |                                  |                                                              |
|-----------------------------------|---------------|---------------------------|---------------------------|-------------------------------------------------------|-------------------------------------------------------|----------------------------------|--------------------------------------------------------------|
|                                   | wildtype      | <i>Pk1</i> <sup>+/-</sup> | <i>Pk2</i> <sup>-/-</sup> | <i>Pk1</i> <sup>+/-</sup> ; <i>Pk2</i> <sup>+/-</sup> | <i>Pk1</i> <sup>+/-</sup> ; <i>Pk2</i> <sup>-/-</sup> | <i>Vangl1</i> CKO <sup>Δ/Δ</sup> | <i>Pk2</i> <sup>-/-</sup> ; <i>Vangl1</i> CKO <sup>Δ/Δ</sup> |
| cells analyzed (n)                | 28            | 36                        | 77                        | 63                                                    | 63                                                    | 88                               | 70                                                           |
| basal bodies analyzed (n)         | 277           | 444                       | 1,039                     | 743                                                   | 595                                                   | 1220                             | 1060                                                         |
| ave. basal bodies per cell +/- SE | 10.65 +/- 1.4 | 12.33 +/- 1.03            | 13.49 +/- 0.79            | 11.79 +/- 1.26                                        | 9.44 +/- 0.39                                         | 13.86 +/- 0.78                   | 15.14 +/- 1.16                                               |

**C**

|                          | genotypes |                           |                           |                                                       |                                                       |                                                       |
|--------------------------|-----------|---------------------------|---------------------------|-------------------------------------------------------|-------------------------------------------------------|-------------------------------------------------------|
|                          | wildtype  | <i>Pk1</i> <sup>-/-</sup> | <i>Pk2</i> <sup>-/-</sup> | <i>Pk1</i> <sup>+/-</sup> ; <i>Pk2</i> <sup>-/-</sup> | <i>Pk1</i> <sup>-/-</sup> ; <i>Pk2</i> <sup>+/-</sup> | <i>Pk1</i> <sup>-/-</sup> ; <i>Pk2</i> <sup>-/-</sup> |
| mouse age                | E18.5     | P0                        | P0                        | P16                                                   | P0                                                    | E18.5                                                 |
| mice (n)                 | 3         | 2                         | 2                         | 1                                                     | 2                                                     | 3                                                     |
| basal feet analyzed (n)  | 23        | 175                       | 133                       | 180                                                   | 67                                                    | 20                                                    |
| correctly oriented (n)   | 21        | 87                        | 112                       | 96                                                    | 32                                                    | 7                                                     |
| incorrectly oriented (n) | 2         | 88                        | 21                        | 84                                                    | 35                                                    | 13                                                    |

Figure S4. **Developmental phenotypes in Pk mutants.** **A.** Craniofacial and **B.** neural tube closure defects in Pk mutant litter mates from a  $Pk1^{+/-}; Pk2^{+/-}$  x  $Pk1^{+/-}; Pk2^{+/-}$  cross.

**A**

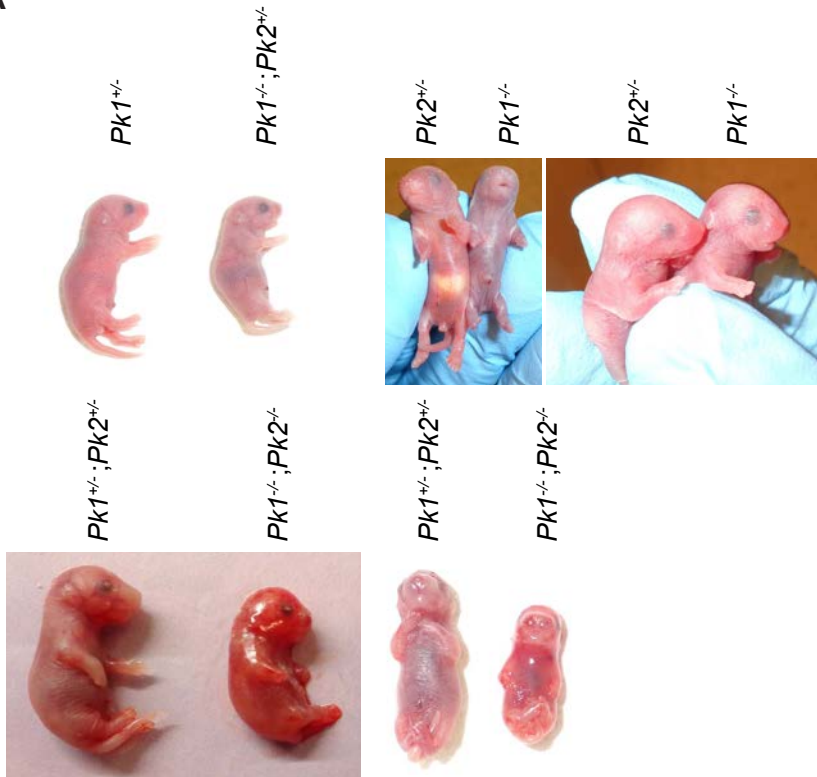

**B**

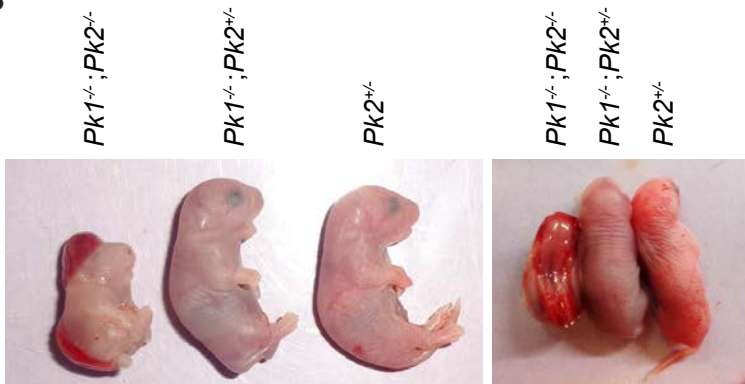

## Supplemental Tables

Table S1. **Antibodies.**

| <b>Protein</b>                         | <b>Antibody</b> | <b>Source</b>              |
|----------------------------------------|-----------------|----------------------------|
| <b>Vangl1</b>                          | HPA025235       | Sigma Aldrich              |
| <b>Prickle1</b>                        | -               | Gibbs <i>et al.</i> , 2016 |
| <b>Prickle2</b>                        | -               | Deans <i>et al.</i> , 2007 |
| <b>Frizzled6</b>                       | AF1526          | R&D Systems                |
| <b>ac. <math>\alpha</math>-Tubulin</b> | ab24610         | Abcam                      |
| <b>GFP</b>                             | 4745-1051       | AbD Serotech               |

Table S2. **Primer sequences.**

| <b>Target</b>            | <b>Forward primer sequence</b> | <b>Reverse primer sequence</b> |
|--------------------------|--------------------------------|--------------------------------|
| <b><i>MmPrickle1</i></b> | GATGGAGAAAGCAAGCCAAG           | TGTGCAGCATGGAAGAGTTC           |
| <b><i>MmPrickle2</i></b> | ACATGGGCACTCTCAACTCC           | TGTATCCTAGGGGGTTGCTG           |
| <b><i>MmPrickle3</i></b> | TGCTGTTTCGAGTGTGAAGC           | CATCACAGTATTCCGCATGG           |
| <b><i>MmPrickle4</i></b> | CCACAGGACAGTGATGAACG           | CCTTCAAGCTTAGGAGGCAG           |
| <b><i>MmCentrin2</i></b> | ACAGGGCAGAACAAGAGCAC           | CCACTGCTTATGGTGACATGG          |
| <b><i>MmGapdh</i></b>    | GACTTCAACAGCAACTCCCAC          | TCCACCACCCTGTTGCTGTA           |

Table S3. Basal feet quantitation of Pk mutant mice from Fig. 4.

| wildtype |              |                |            | <i>Pk1</i> <sup>-/-</sup> |              |                |            | <i>Pk2</i> <sup>-/-</sup> |              |                |            | <i>Pk1</i> <sup>+/-</sup> ; <i>Pk2</i> <sup>-/-</sup> |              |                |            | <i>Pk1</i> <sup>-/-</sup> ; <i>Pk2</i> <sup>+/-</sup> |              |                |            | <i>Pk1</i> <sup>+/-</sup> ; <i>Pk2</i> <sup>+/-</sup> |              |                |            |
|----------|--------------|----------------|------------|---------------------------|--------------|----------------|------------|---------------------------|--------------|----------------|------------|-------------------------------------------------------|--------------|----------------|------------|-------------------------------------------------------|--------------|----------------|------------|-------------------------------------------------------|--------------|----------------|------------|
| cell     | BB - correct | BB - incorrect | BB - total | cell                      | BB - correct | BB - incorrect | BB - total | cell                      | BB - correct | BB - incorrect | BB - total | cell                                                  | BB - correct | BB - incorrect | BB - total | cell                                                  | BB - correct | BB - incorrect | BB - total | cell                                                  | BB - correct | BB - incorrect | BB - total |
| 1        | 4            | 1              | 5          | 1                         | 1            | 3              | 4          | 1                         | 5            | 0              | 5          | 1                                                     | 4            | 1              | 5          | 1                                                     | 2            | 2              | 4          | 1                                                     | 1            | 0              | 1          |
| 2        | 3            | 0              | 3          | 2                         | 2            | 5              | 7          | 2                         | 8            | 0              | 8          | 2                                                     | 8            | 11             | 19         | 2                                                     | 0            | 2              | 2          | 2                                                     | 0            | 1              | 1          |
| 3        | 3            | 0              | 3          | 3                         | 1            | 5              | 6          | 3                         | 3            | 4              | 7          | 3                                                     | 0            | 5              | 5          | 3                                                     | 2            | 3              | 5          | 3                                                     | 2            | 2              | 4          |
| 4        | 1            | 0              | 1          | 4                         | 3            | 3              | 6          | 4                         | 10           | 1              | 11         | 4                                                     | 11           | 5              | 16         | 4                                                     | 0            | 2              | 2          | 4                                                     | 2            | 0              | 2          |
| 5        | 1            | 0              | 1          | 5                         | 4            | 1              | 5          | 5                         | 8            | 1              | 9          | 5                                                     | 21           | 0              | 21         | 5                                                     | 2            | 0              | 2          | 5                                                     | 0            | 1              | 1          |
| 6        | 4            | 0              | 4          | 6                         | 3            | 7              | 10         | 6                         | 5            | 0              | 5          | 6                                                     | 2            | 10             | 12         | 6                                                     | 1            | 3              | 4          | 6                                                     | 1            | 0              | 1          |
| 7        | 1            | 0              | 1          | 7                         | 2            | 1              | 3          | 7                         | 7            | 0              | 7          | 7                                                     | 18           | 18             | 36         | 7                                                     | 2            | 1              | 3          | 7                                                     | 0            | 1              | 1          |
| 8        | 1            | 1              | 2          | 8                         | 5            | 0              | 5          | 8                         | 4            | 4              | 8          | 8                                                     | 5            | 7              | 12         | 8                                                     | 2            | 3              | 5          | 8                                                     | 0            | 1              | 1          |
| 9        | 1            | 0              | 1          | 9                         | 3            | 0              | 3          | 9                         | 13           | 1              | 14         | 9                                                     | 5            | 1              | 6          | 9                                                     | 1            | 1              | 2          | 9                                                     | 0            | 1              | 1          |
| 10       | 2            | 0              | 2          | 10                        | 4            | 4              | 8          | 10                        | 4            | 3              | 7          | 10                                                    | 4            | 3              | 7          | 10                                                    | 3            | 3              | 6          | 10                                                    | 0            | 3              | 3          |
|          |              |                |            | 11                        | 0            | 3              | 3          | 11                        | 8            | 0              | 8          | 11                                                    | 3            | 1              | 4          | 11                                                    | 4            | 1              | 5          | 11                                                    | 0            | 1              | 1          |
|          |              |                |            | 12                        | 0            | 2              | 2          | 12                        | 8            | 0              | 8          | 12                                                    | 2            | 2              | 4          | 12                                                    | 1            | 4              | 5          | 12                                                    | 0            | 1              | 1          |
|          |              |                |            | 13                        | 2            | 0              | 2          | 13                        | 8            | 2              | 10         | 13                                                    | 1            | 1              | 2          | 13                                                    | 4            | 2              | 6          | 13                                                    | 0            | 2              | 2          |
|          |              |                |            | 14                        | 3            | 10             | 13         | 14                        | 4            | 0              | 4          | 14                                                    | 3            | 2              | 5          | 14                                                    | 1            | 5              | 6          | 14                                                    | 1            | 0              | 1          |
|          |              |                |            | 15                        | 1            | 0              | 1          | 15                        | 5            | 1              | 6          | 15                                                    | 2            | 2              | 4          | 15                                                    | 3            | 0              | 3          |                                                       |              |                |            |
|          |              |                |            | 16                        | 3            | 6              | 9          | 16                        | 4            | 1              | 5          | 16                                                    | 0            | 1              | 1          | 17                                                    | 4            | 3              | 7          |                                                       |              |                |            |
|          |              |                |            | 17                        | 2            | 1              | 3          | 17                        | 5            | 2              | 7          | 17                                                    | 1            | 2              | 3          |                                                       |              |                |            |                                                       |              |                |            |
|          |              |                |            | 18                        | 0            | 8              | 8          | 18                        | 3            | 1              | 4          | 18                                                    | 5            | 3              | 8          |                                                       |              |                |            |                                                       |              |                |            |
|          |              |                |            | 19                        | 5            | 0              | 5          |                           |              |                |            | 19                                                    | 0            | 6              | 6          |                                                       |              |                |            |                                                       |              |                |            |
|          |              |                |            | 20                        | 12           | 0              | 12         |                           |              |                |            | 20                                                    | 1            | 3              | 4          |                                                       |              |                |            |                                                       |              |                |            |
|          |              |                |            | 21                        | 2            | 3              | 5          |                           |              |                |            |                                                       |              |                |            |                                                       |              |                |            |                                                       |              |                |            |
|          |              |                |            | 22                        | 4            | 0              | 4          |                           |              |                |            |                                                       |              |                |            |                                                       |              |                |            |                                                       |              |                |            |
|          |              |                |            | 23                        | 3            | 3              | 6          |                           |              |                |            |                                                       |              |                |            |                                                       |              |                |            |                                                       |              |                |            |
|          |              |                |            | 24                        | 3            | 2              | 5          |                           |              |                |            |                                                       |              |                |            |                                                       |              |                |            |                                                       |              |                |            |
|          |              |                |            | 25                        | 2            | 2              | 4          |                           |              |                |            |                                                       |              |                |            |                                                       |              |                |            |                                                       |              |                |            |
|          |              |                |            | 26                        | 3            | 3              | 6          |                           |              |                |            |                                                       |              |                |            |                                                       |              |                |            |                                                       |              |                |            |
|          |              |                |            | 27                        | 4            | 2              | 6          |                           |              |                |            |                                                       |              |                |            |                                                       |              |                |            |                                                       |              |                |            |
|          |              |                |            | 28                        | 0            | 3              | 3          |                           |              |                |            |                                                       |              |                |            |                                                       |              |                |            |                                                       |              |                |            |
|          |              |                |            | 29                        | 4            | 3              | 7          |                           |              |                |            |                                                       |              |                |            |                                                       |              |                |            |                                                       |              |                |            |
|          |              |                |            | 30                        | 0            | 3              | 3          |                           |              |                |            |                                                       |              |                |            |                                                       |              |                |            |                                                       |              |                |            |
|          |              |                |            | 31                        | 0            | 3              | 3          |                           |              |                |            |                                                       |              |                |            |                                                       |              |                |            |                                                       |              |                |            |
|          |              |                |            | 32                        | 4            | 0              | 4          |                           |              |                |            |                                                       |              |                |            |                                                       |              |                |            |                                                       |              |                |            |
|          |              |                |            | 33                        | 2            | 2              | 4          |                           |              |                |            |                                                       |              |                |            |                                                       |              |                |            |                                                       |              |                |            |
| 21       | 2            | 23             |            | 87                        | 88           | 175            |            | 112                       | 21           | 133            |            | 96                                                    | 84           | 180            |            | 32                                                    | 35           | 67             |            | 7                                                     | 14           | 21             | TOTAL (n)  |
